# Supplementary material for: Temperature-dependent behavior in the local structure of BaTiO3 nanocrystals
Source: Royal Society of Chemistry journal article supplement (doi:10.1039/d2ce00705c), 2022-01-01
Supplement: d2ce00705c1.pdf [file d2ce00705c1.pdf]

**Electronic Supplementary Information**

Temperature-dependent behavior in the local structure of BaTiO<sub>3</sub> nanocrystals

Patrick Cottingham<sup>a</sup> and Richard L. Brutchey<sup>a,\*</sup>

<sup>a</sup>Department of Chemistry, University of Southern California, Los Angeles, CA 90089, United States

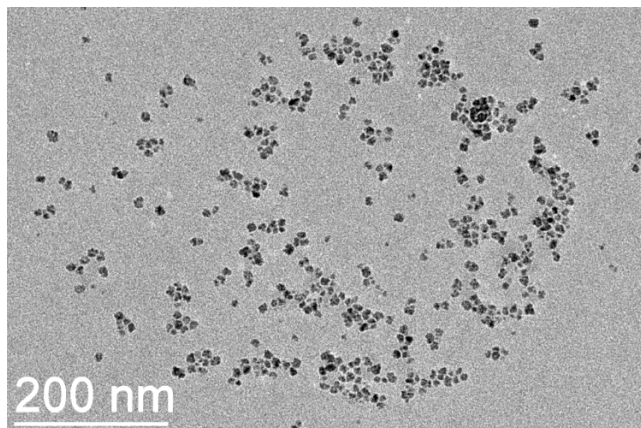

**Fig. S1** TEM micrograph of *ca.* 12 nm BaTiO<sub>3</sub> nanocrystals.

**Table S1.** Parameters from Rietveld refinements of the  $Pm\bar{3}m$  cubic structure of BaTiO<sub>3</sub> to synchrotron X-ray diffraction data collected on 12 nm BaTiO<sub>3</sub> nanocrystals at  $T = 253$  K and  $T = 413$  K.

| $T = 253$ K; $R_w = 3.97\%$                          |     |     |     |             |
|------------------------------------------------------|-----|-----|-----|-------------|
| $a = 4.03646(22)$ Å; $V = 65.766(11)$ Å <sup>3</sup> |     |     |     |             |
| atom                                                 | x   | y   | z   | $U_{iso}$   |
| Ba                                                   | 0.0 | 0.0 | 0.0 | 0.00996(27) |
| Ti                                                   | 0.5 | 0.5 | 0.5 | 0.0156(5)   |
| O                                                    | 0.5 | 0.5 | 0.0 | 0.0023(7)   |
| $T = 413$ K; $R_w = 3.93\%$                          |     |     |     |             |
| $a = 4.04086(24)$ Å; $V = 65.981(12)$ Å <sup>3</sup> |     |     |     |             |
| atom                                                 | x   | y   | z   | $U_{iso}$   |
| Ba                                                   | 0.0 | 0.0 | 0.0 | 0.01255(30) |
| Ti                                                   | 0.5 | 0.5 | 0.5 | 0.0166(5)   |
| O                                                    | 0.5 | 0.5 | 0.0 | 0.0040(8)   |

**Table S2.** Parameters from fits of the  $Pm\bar{3}m$  cubic,  $P4mm$  tetragonal, and  $Amm2$  orthorhombic structures of  $BaTiO_3$  to PDFs from synchrotron X-ray total scattering data collected on 12 nm  $BaTiO_3$  nanocrystals at  $T = 253$  K and  $T = 413$  K.

| $Pm\bar{3}m$ cubic $BaTiO_3$ ; $T = 253$ K; $R_w = 14.9\%$                                                |       |       |       |           |
|-----------------------------------------------------------------------------------------------------------|-------|-------|-------|-----------|
| $a = 4.029 \text{ \AA}$ ; $V = 65.421 \text{ \AA}^3$                                                      |       |       |       |           |
| atom                                                                                                      | x     | y     | z     | $U_{iso}$ |
| Ba                                                                                                        | 0.000 | 0.000 | 0.000 | 0.006     |
| Ti                                                                                                        | 0.500 | 0.500 | 0.500 | 0.017     |
| O                                                                                                         | 0.500 | 0.500 | 0.000 | 0.027     |
| $P4mm$ tetragonal $BaTiO_3$ ; $T = 253$ K; $R_w = 13.4\%$                                                 |       |       |       |           |
| $a = 4.007 \text{ \AA}$ ; $c = 4.077 \text{ \AA}$ ; $V = 65.469 \text{ \AA}^3$                            |       |       |       |           |
| Atom                                                                                                      | x     | y     | z     | $U_{iso}$ |
| Ba                                                                                                        | 0.000 | 0.000 | 0.000 | 0.005     |
| Ti                                                                                                        | 0.500 | 0.500 | 0.523 | 0.012     |
| O                                                                                                         | 0.500 | 0.500 | 0.000 | 0.025     |
| $Amm2$ orthorhombic $BaTiO_3$ ; $T = 253$ K; $R_w = 13.9\%$                                               |       |       |       |           |
| $a = 3.994 \text{ \AA}$ ; $b = 5.689 \text{ \AA}$ ; $c = 5.763 \text{ \AA}$ ; $V = 130.951 \text{ \AA}^3$ |       |       |       |           |
| Atom                                                                                                      | x     | y     | z     | $U_{iso}$ |
| Ba                                                                                                        | 0.000 | 0.000 | 0.000 | 0.005     |
| Ti                                                                                                        | 0.500 | 0.000 | 0.519 | 0.011     |
| O                                                                                                         | 0.000 | 0.000 | 0.500 | 0.025     |
| $Pm\bar{3}m$ cubic $BaTiO_3$ ; $T = 413$ K; $R_w = 14.6\%$                                                |       |       |       |           |
| $a = 4.035 \text{ \AA}$ ; $V = 65.718 \text{ \AA}^3$                                                      |       |       |       |           |
| Atom                                                                                                      | x     | y     | z     | $U_{iso}$ |
| Ba                                                                                                        | 0.000 | 0.000 | 0.000 | 0.008     |
| Ti                                                                                                        | 0.500 | 0.500 | 0.500 | 0.019     |

|                                                                                               |       |       |       |                         |
|-----------------------------------------------------------------------------------------------|-------|-------|-------|-------------------------|
| O                                                                                             | 0.500 | 0.500 | 0.000 | 0.030                   |
| <i>P4mm</i> tetragonal BaTiO <sub>3</sub> ; <i>T</i> = 413 K; <i>Rw</i> = 13.3%               |       |       |       |                         |
| <i>a</i> = 4.012 Å; <i>c</i> = 4.086 Å; <i>V</i> = 65.771 Å <sup>3</sup>                      |       |       |       |                         |
| Atom                                                                                          | x     | y     | z     | <i>U</i> <sub>iso</sub> |
| Ba                                                                                            | 0.000 | 0.000 | 0.000 | 0.007                   |
| Ti                                                                                            | 0.500 | 0.500 | 0.525 | 0.013                   |
| O                                                                                             | 0.500 | 0.500 | 0.000 | 0.028                   |
| <i>Amm2</i> orthorhombic BaTiO <sub>3</sub> ; <i>T</i> = 413 K; <i>Rw</i> = 13.1%             |       |       |       |                         |
| <i>a</i> = 3.998 Å; <i>b</i> = 5.692 Å; <i>c</i> = 5.783 Å; <i>V</i> = 131.604 Å <sup>3</sup> |       |       |       |                         |
| atom                                                                                          | x     | y     | z     | <i>U</i> <sub>iso</sub> |
| Ba                                                                                            | 0.000 | 0.000 | 0.000 | 0.007                   |
| Ti                                                                                            | 0.500 | 0.000 | 0.521 | 0.012                   |
| O                                                                                             | 0.000 | 0.000 | 0.500 | 0.028                   |

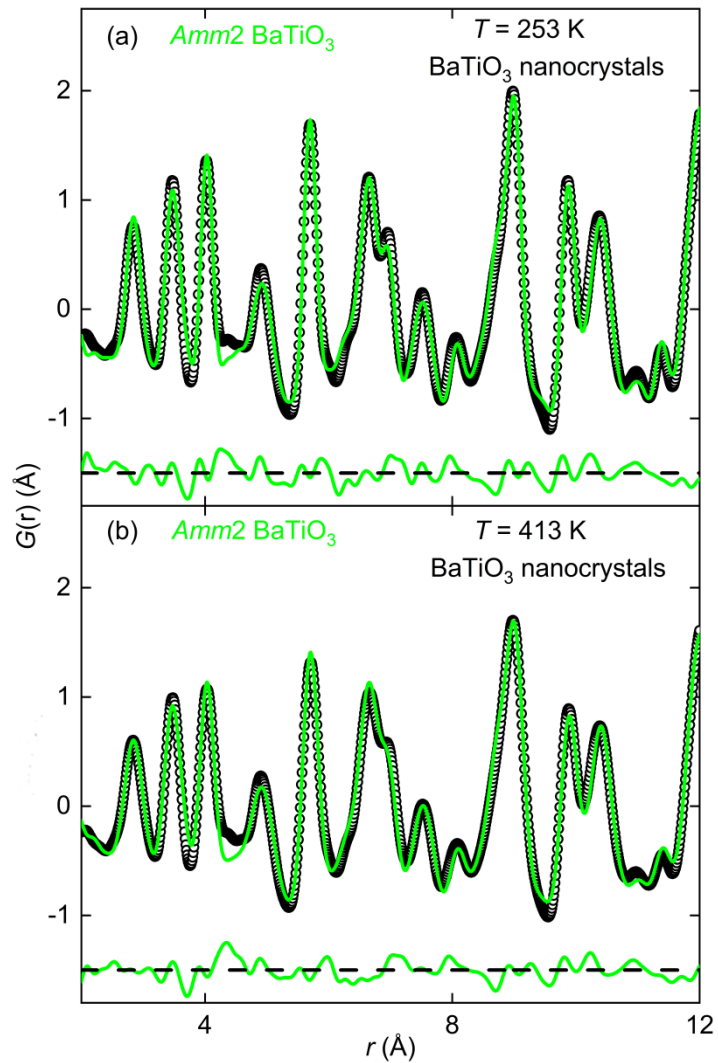

**Fig. S2** Orthorhombic fits to PDFs of X-ray total scattering data collected on BaTiO<sub>3</sub> nanocrystals collected at (a)  $T = 253$  K and (b)  $T = 413$  K. Upper green lines represent the fit to the data. Lower green lines represent the difference between the fit and the data, with a dashed line to indicate a reference for no difference.

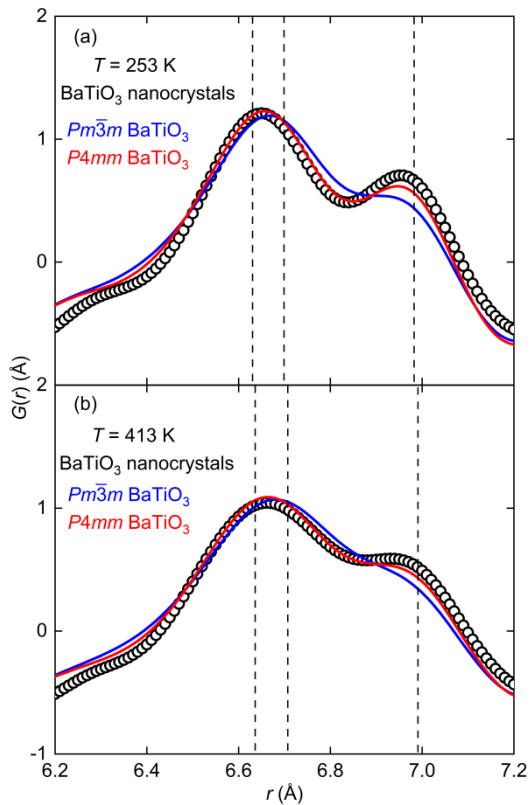

**Fig. S3** Zoom-in on features of the PDFs shown in Fig. 3. The feature in the PDF centered at  $r \approx 6.8 \text{ \AA}$  contains contributions from three atomic pairs in the tetragonal model of  $\text{BaTiO}_3$ ; that is, two Ba-Ti pairs and one Ba-Ba pair. The dashed vertical lines indicate the radii of those pairs, with  $r_{\text{Ba-Ti}} = 6.63, 6.67$  and  $r_{\text{Ba-Ba}} = 6.98 \text{ \AA}$  at  $T = 253 \text{ K}$  and  $r_{\text{Ba-Ti}} = 6.63, 6.70$  and  $r_{\text{Ba-Ba}} = 6.99 \text{ \AA}$  at  $T = 413 \text{ K}$ . The tetragonal  $P4mm$  model provides better resolution of these peaks at both temperatures.

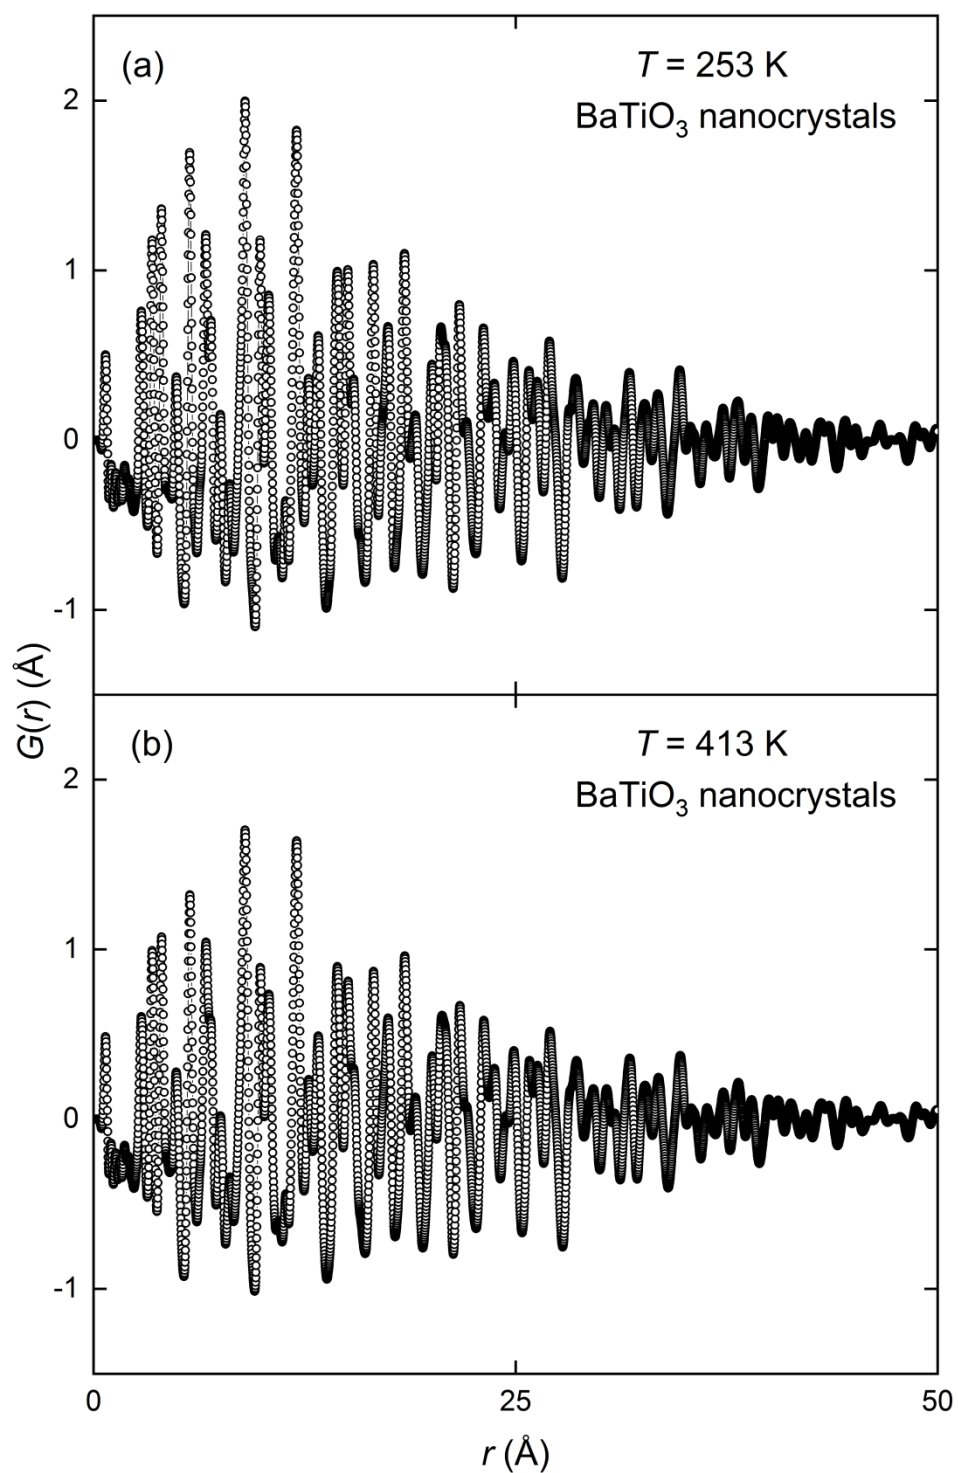

**Fig. S4** PDFs,  $G(r)$ , of  $\text{BaTiO}_3$  nanocrystals collected at (a)  $T = 253 \text{ K}$  and (b)  $T = 413 \text{ K}$ . The rapid attenuation of  $G(r)$  at higher values of  $r$  is due to the loss of coherence of the overall structure.
